# Supplementary material
Source: publisher site journal article supplement (https://www.dovepress.com/article/398351)
Supplement: Supplementary file 1 [file get_supplementary_file.php]

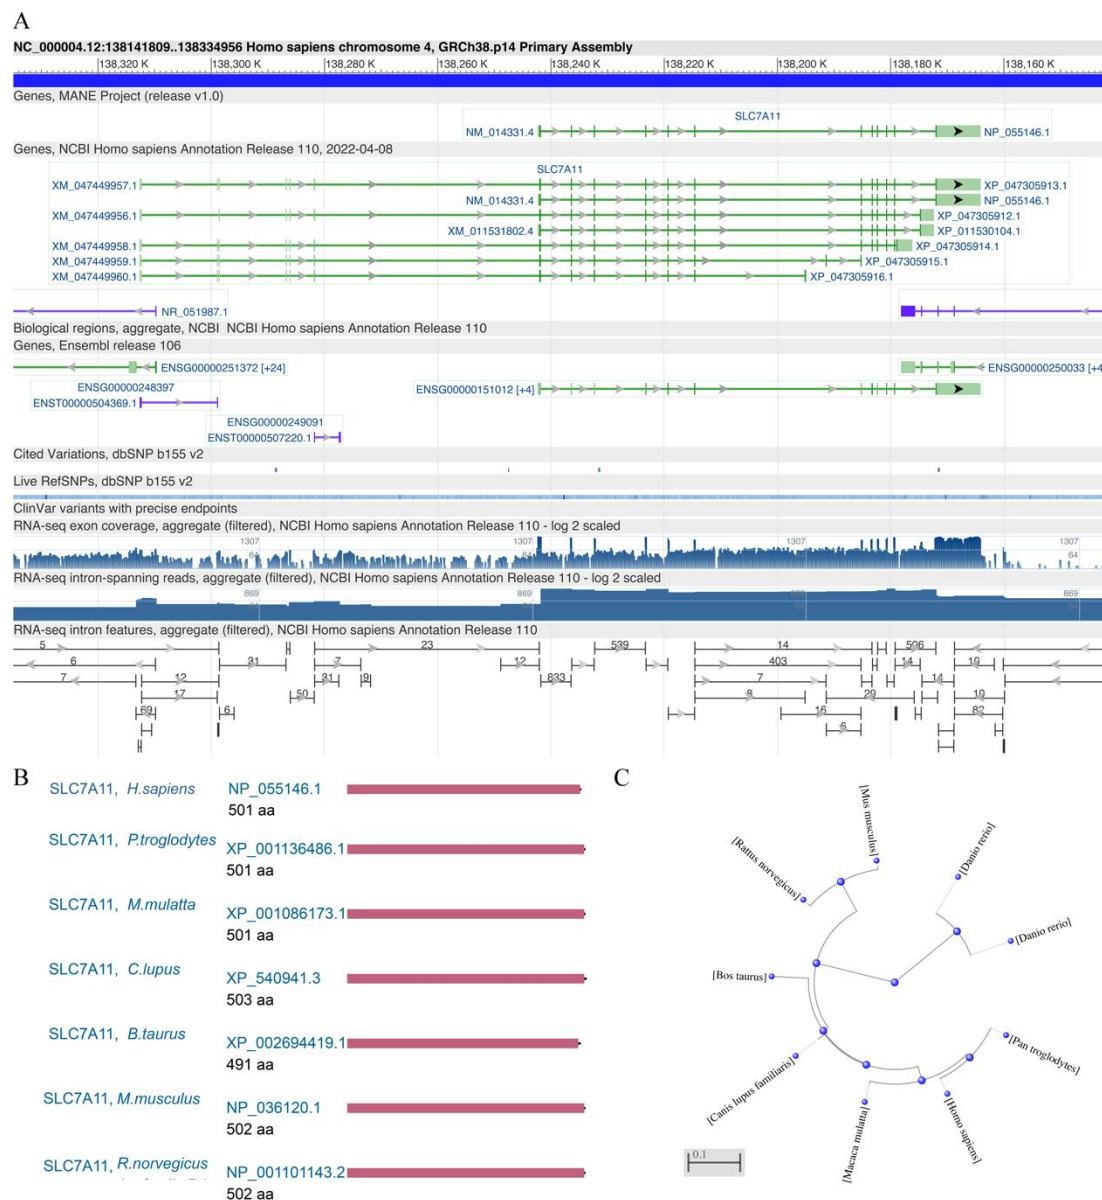

**Figure S1 Genomic regions, transcripts, and protein sequences conservative analysis of Solute carrier family 7 member 11 (SLC7A11).** (A) the genomic regions, transcript, and products of SLC7A11. (B) SLC7A11 is highly conserved across species. (C) Phylogenetic analysis showed the SLC7A11 has conserved sequences within different species.

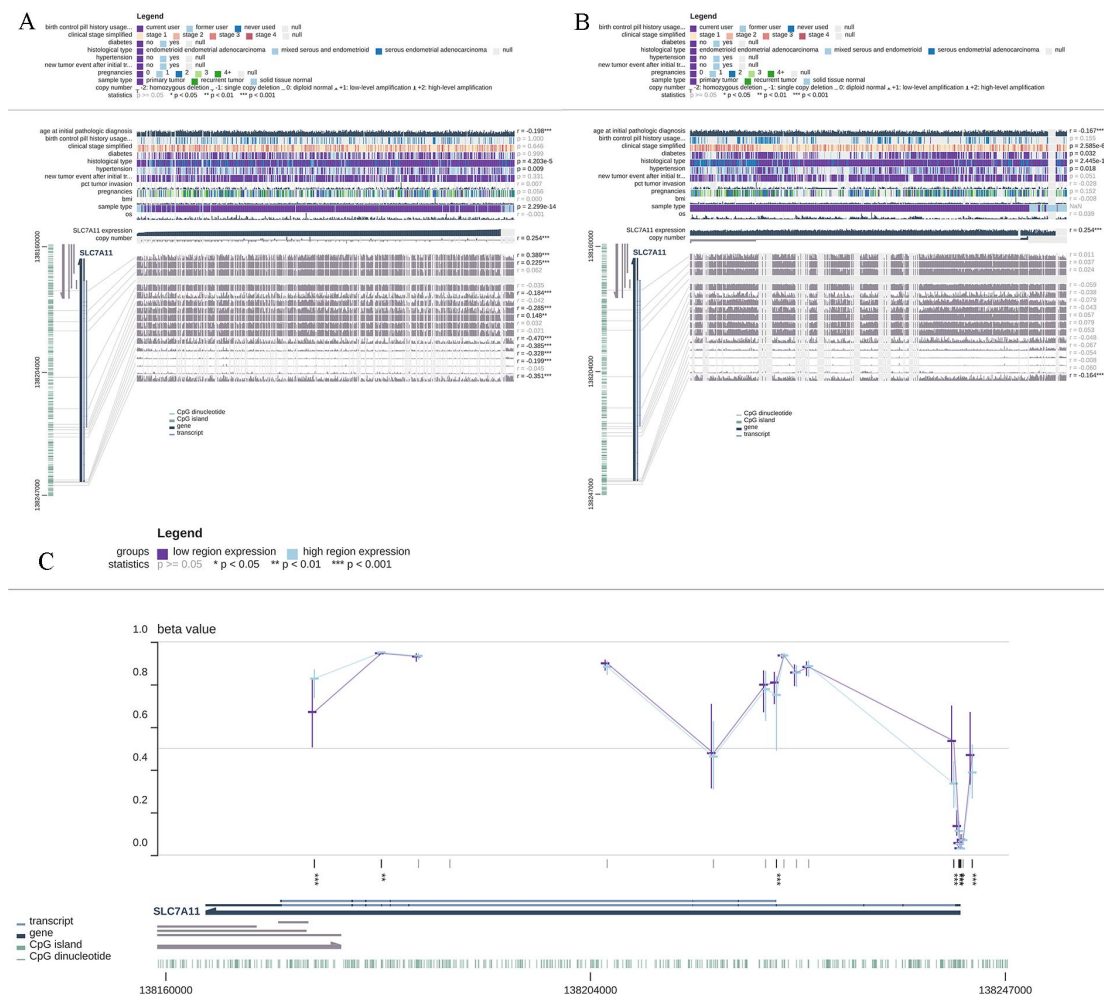

**Figure S2** Methylation level of Solute carrier family 7 member 11 (SLC7A11) DNA in Uterine corpus endometrial carcinoma (UCEC) and its association with clinicopathological features. (A, B) Correlations of DNA methylation level of SLC7A11 with multiple probes with clinicopathological features in UCEC; (A) Sort the samples by gene expression, (B) Sort the samples by copy number. (C) The correlation between SLC7A11 expression and its DNA methylation.

**Table S1** Real time RT-PCR primers.

| RNA     | Direction | Primer                        |
|---------|-----------|-------------------------------|
| SLC7A11 | Forward   | 5'-GCGTGGGCATGTCTCTGAC-3'     |
|         | Reverse   | 5'-GCTGGTAATGGACCAAAGACTTC-3' |

*SLC7A11* Solute carrier family 7 member 11, RT-PCR reverse transcription-polymerase chain reaction
